# Supplementary material for: N-Arylation of Protected and Unprotected 5-Bromo-2-aminobenzimidazole as Organic Material: Non-Linear Optical (NLO) Properties and Structural Feature Determination through Computational Approach
Source: MDPI journal article supplement (doi:10.3390/molecules26226920), 2021-11-17
Supplement: s1 [file s1]

## Supplementary Data

**N-Arylation of protected & unprotected 5-bromo 2-amino benzoimidazole as Organic material: Non-linear optical (NLO) properties and structural feature determination through computational approach**

Mubeen Mumtaz <sup>1</sup>, Nasir Rasool <sup>1,\*</sup>, Gulraiz Ahmad <sup>1</sup>, Naveen Kosar <sup>2,3</sup>, Umer Rashid <sup>4,\*</sup>

<sup>1</sup> Department of Chemistry, Government College University, Faisalabad 38000, Pakistan

<sup>2</sup> Department of Chemistry, University of Management and Technology (UMT), C11, Johar Town Lahore, Pakistan

<sup>3</sup> Department of Chemistry, COMSATS University Islamabad, Abbottabad Campus, Abbottabad, Pakistan

<sup>4</sup> Institute of Advanced Technology, University Putra Malaysia, 43400 UPM Serdang, Selangor, Malaysia

\* Corresponding authors E-mail addresses:

**Nasir Rasool** Email: [nasirrasool@gcuf.edu.pk](mailto:nasirrasool@gcuf.edu.pk)

**Umer Rashid** Email: [umer.rashid@upm.edu.my](mailto:umer.rashid@upm.edu.my)

## Table of Contents:

|                                                                                                          |            |
|----------------------------------------------------------------------------------------------------------|------------|
| <b>Figure S1:</b> $^1\text{H}$ NMR spectrum of compound <b>1a</b> .....                                  | <b>S3</b>  |
| <b>Figure S2:</b> $^{13}\text{C}$ NMR spectrum of compound <b>1a</b> .....                               | <b>S3</b>  |
| <b>Figure S3:</b> $^1\text{H}$ NMR spectrum of compound <b>1b</b> .....                                  | <b>S4</b>  |
| <b>Figure S4:</b> $^{13}\text{C}$ NMR spectrum of compound <b>1b</b> .....                               | <b>S4</b>  |
| <b>Figure S5:</b> $^1\text{H}$ NMR spectrum of compound <b>1c</b> .....                                  | <b>S5</b>  |
| <b>Figure S6:</b> $^{13}\text{C}$ NMR spectrum of compound <b>1c</b> .....                               | <b>S5</b>  |
| <b>Figure S7:</b> $^1\text{H}$ NMR spectrum of compound <b>1d</b> .....                                  | <b>S6</b>  |
| <b>Figure S8:</b> $^{13}\text{C}$ NMR spectrum of compound <b>1d</b> .....                               | <b>S6</b>  |
| <b>Figure S9:</b> $^1\text{H}$ NMR spectrum of compound <b>1e</b> .....                                  | <b>S7</b>  |
| <b>Figure S10:</b> $^{13}\text{C}$ NMR spectrum of compound <b>1e</b> .....                              | <b>S7</b>  |
| <b>Figure S11:</b> $^1\text{H}$ NMR spectrum of compound <b>1f</b> .....                                 | <b>S8</b>  |
| <b>Figure S12:</b> $^{13}\text{C}$ NMR spectrum of compound <b>1f</b> .....                              | <b>S8</b>  |
| <b>Figure S13:</b> $^1\text{H}$ NMR spectrum of compound <b>2a</b> .....                                 | <b>S9</b>  |
| <b>Figure S14:</b> $^1\text{H}$ NMR spectrum of compound <b>2d</b> .....                                 | <b>S9</b>  |
| <b>Figure S15:</b> $^1\text{H}$ NMR spectrum of compound <b>2e</b> .....                                 | <b>S10</b> |
| <b>Figure S16:</b> $^{13}\text{C}$ NMR spectrum of compound <b>2e</b> .....                              | <b>S10</b> |
| <b>Figure S17:</b> $^1\text{H}$ NMR spectrum of compound <b>2f</b> .....                                 | <b>S11</b> |
| <b>Figure S18:</b> $^{13}\text{C}$ NMR spectrum of compound <b>2f</b> .....                              | <b>S11</b> |
| <b>Table S1:</b> Polarizability and hyperpolarizability of compounds <b>1a-1f</b> and <b>2a-2f</b> ..... | <b>S12</b> |

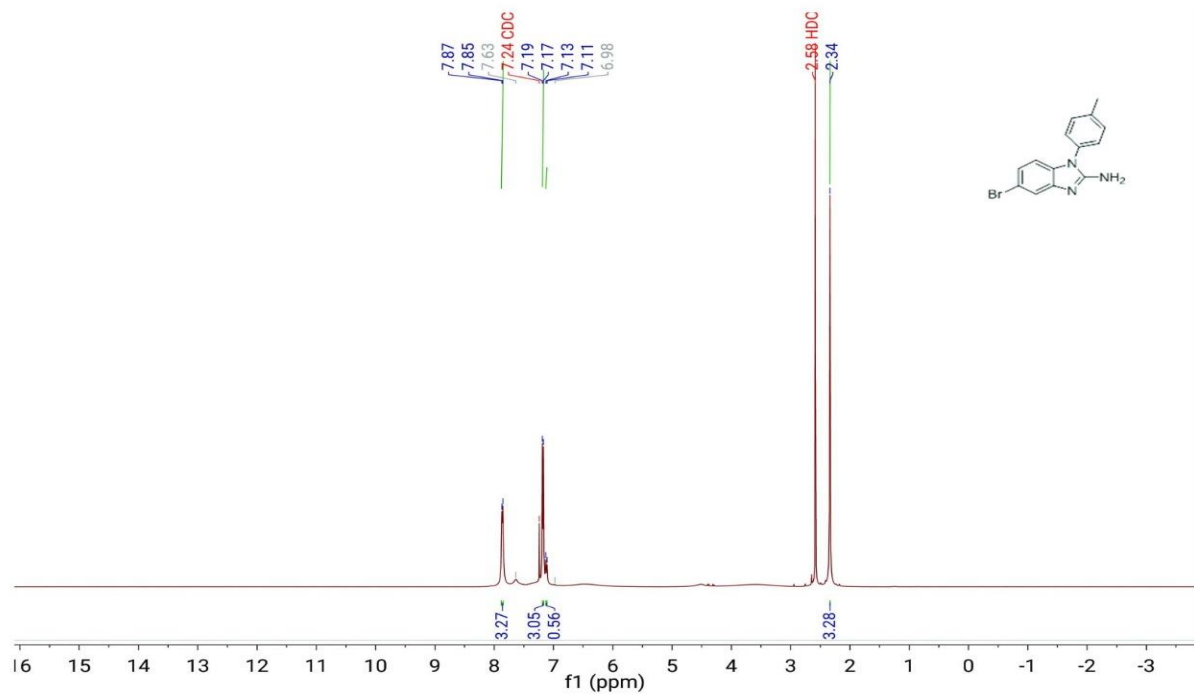

**Figure S1.** <sup>1</sup>H NMR (400 MHz, CDCl<sub>3</sub>) of compound **1a**.

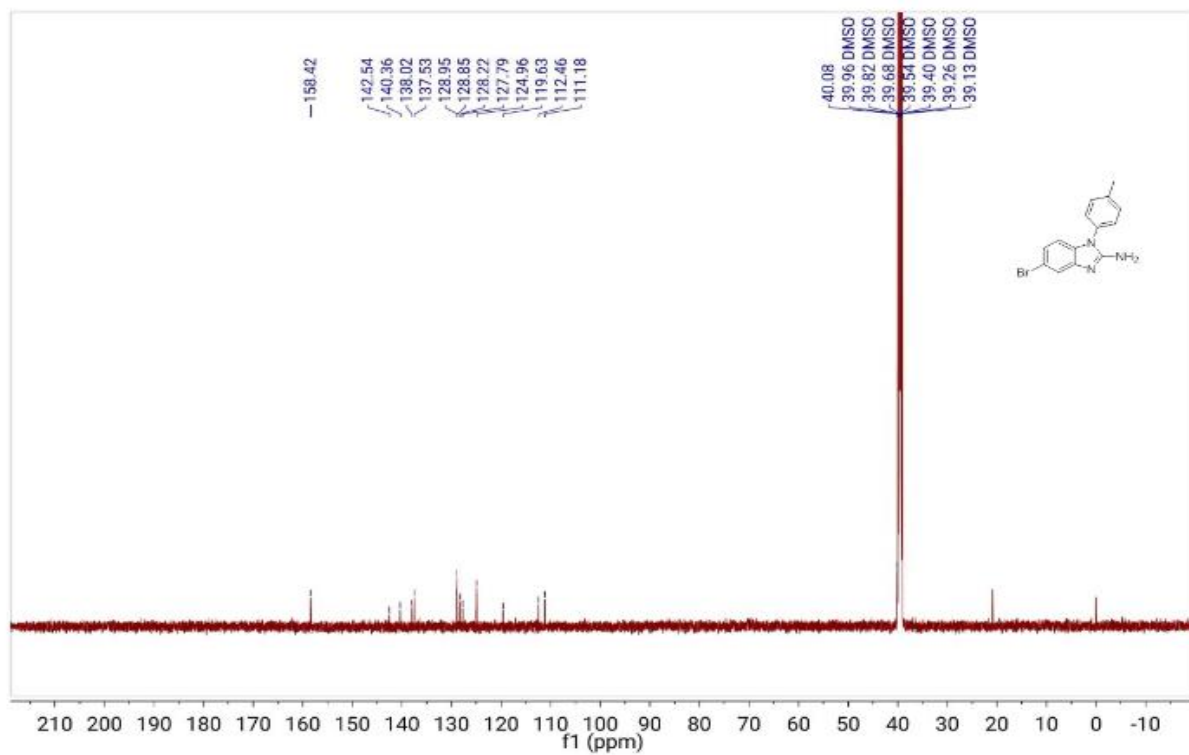

**Figure S2.** <sup>13</sup>C NMR (125 MHz, DMSO-*d*<sub>6</sub>) of compound **1a**.

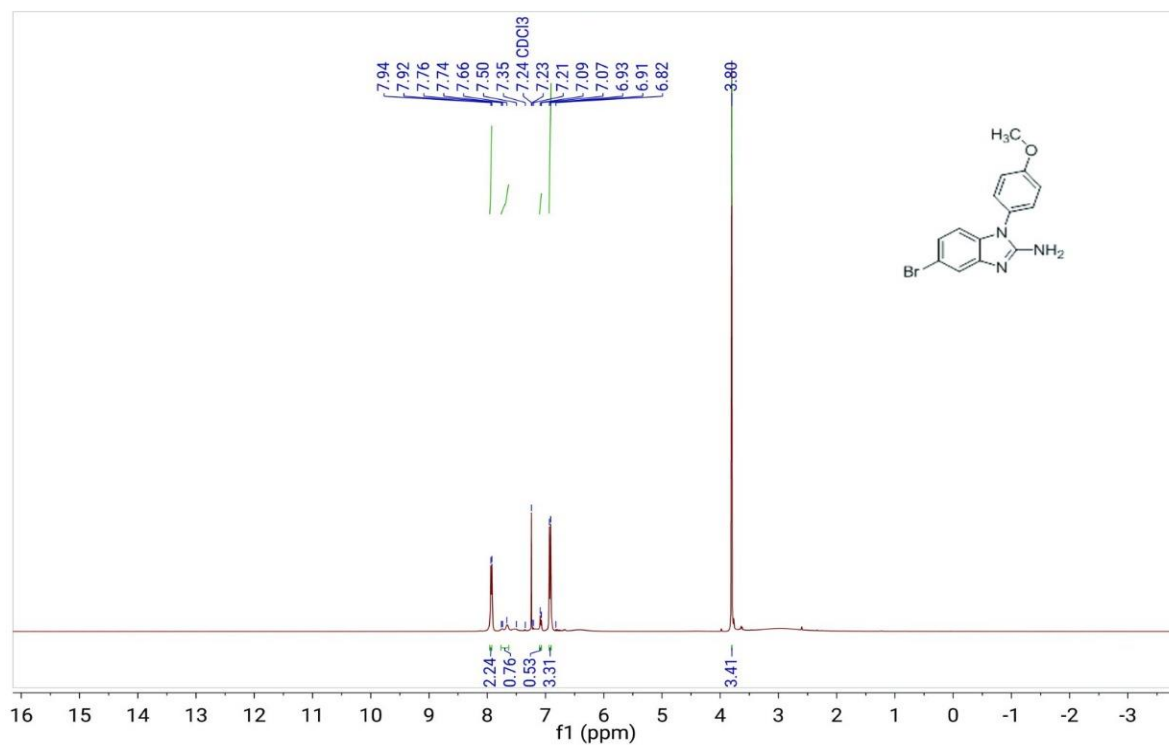

**Figure S3.** <sup>1</sup>H NMR (400 MHz, CDCl<sub>3</sub>) of compound **1b**.

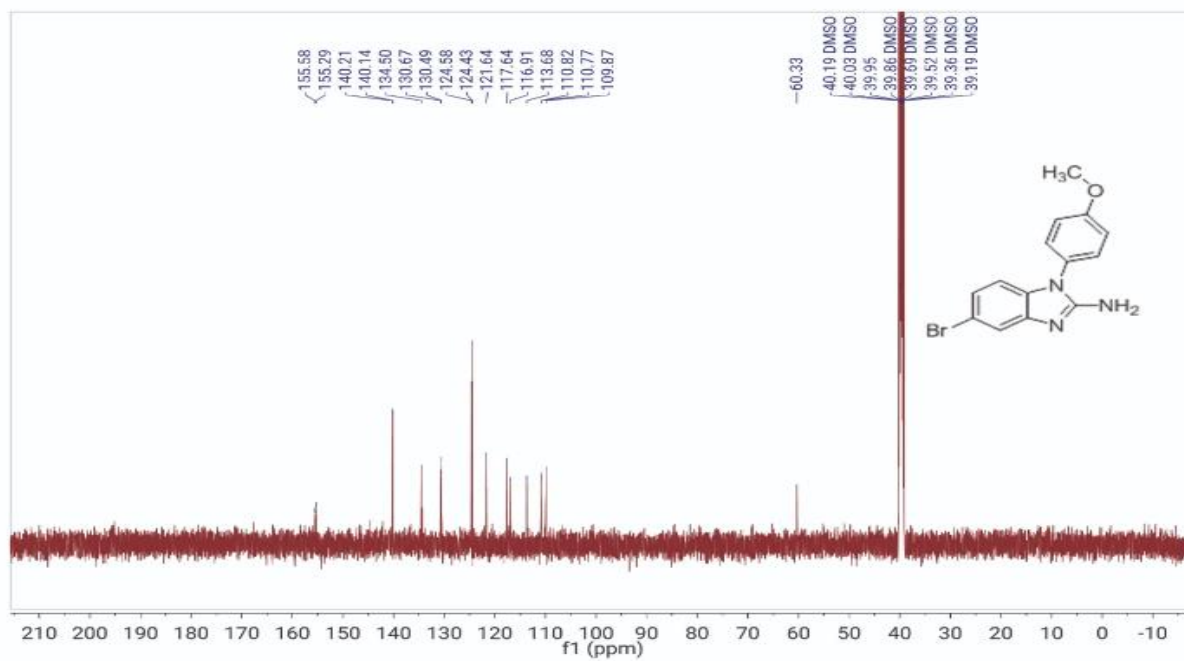

**Figure S4.** <sup>13</sup>C NMR (125 MHz, DMSO-*d*<sub>6</sub>) of compound **1b**.

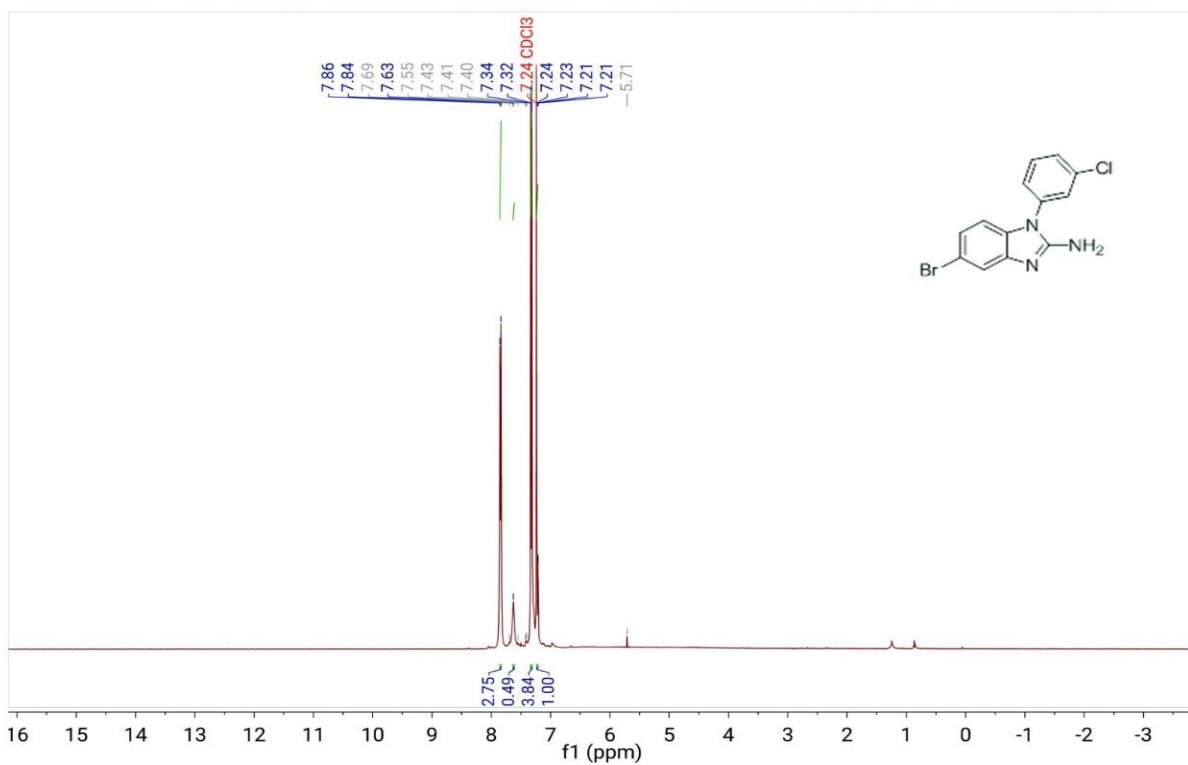

**Figure S5.** <sup>1</sup>H NMR (400 MHz, CDCl<sub>3</sub>) of compound **1c**.

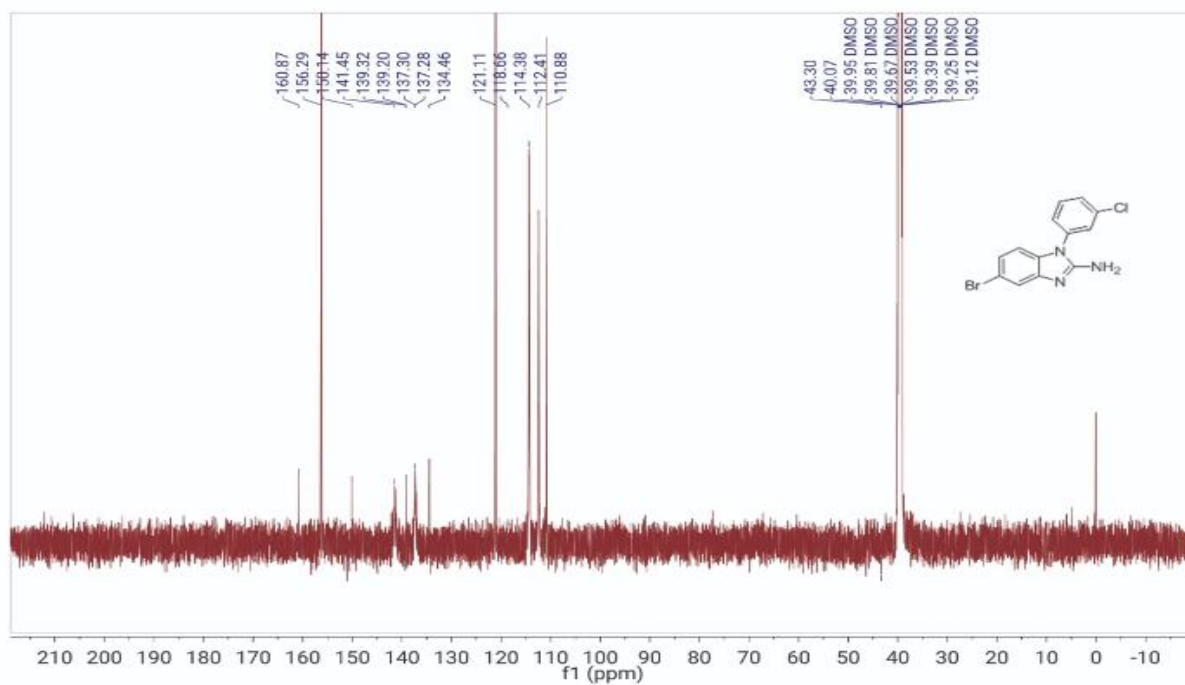

**Figure S6.** <sup>13</sup>C NMR (125 MHz, DMSO-*d*<sub>6</sub>) of compound **1c**.

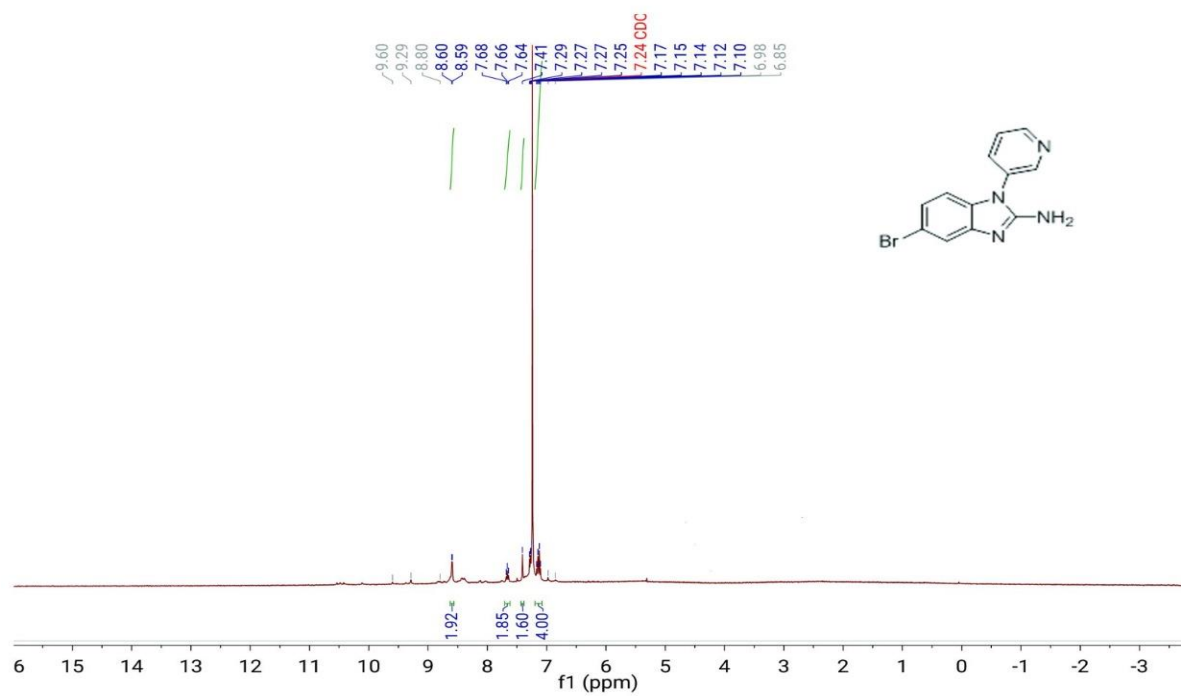

**Figure S7.** <sup>1</sup>H NMR (400 MHz, CDCl<sub>3</sub>) of compound **1d**.

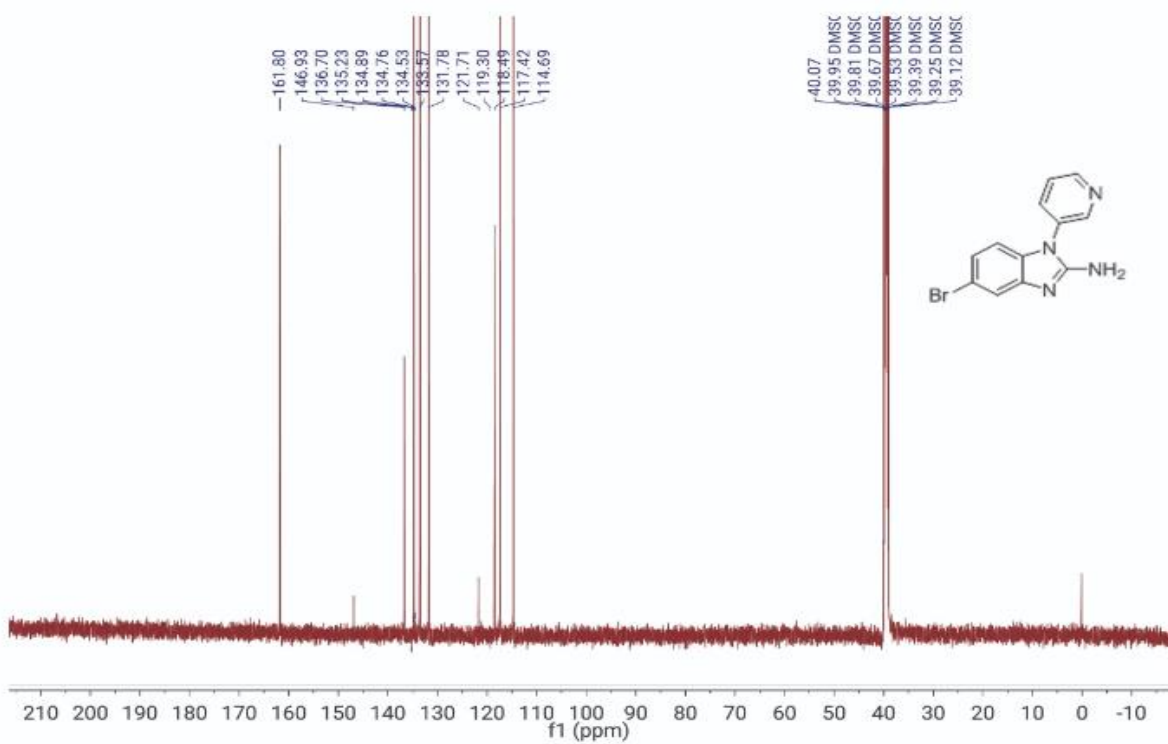

**Figure S8.** <sup>13</sup>C NMR (125 MHz, DMSO-*d*<sub>6</sub>) of compound **1d**.

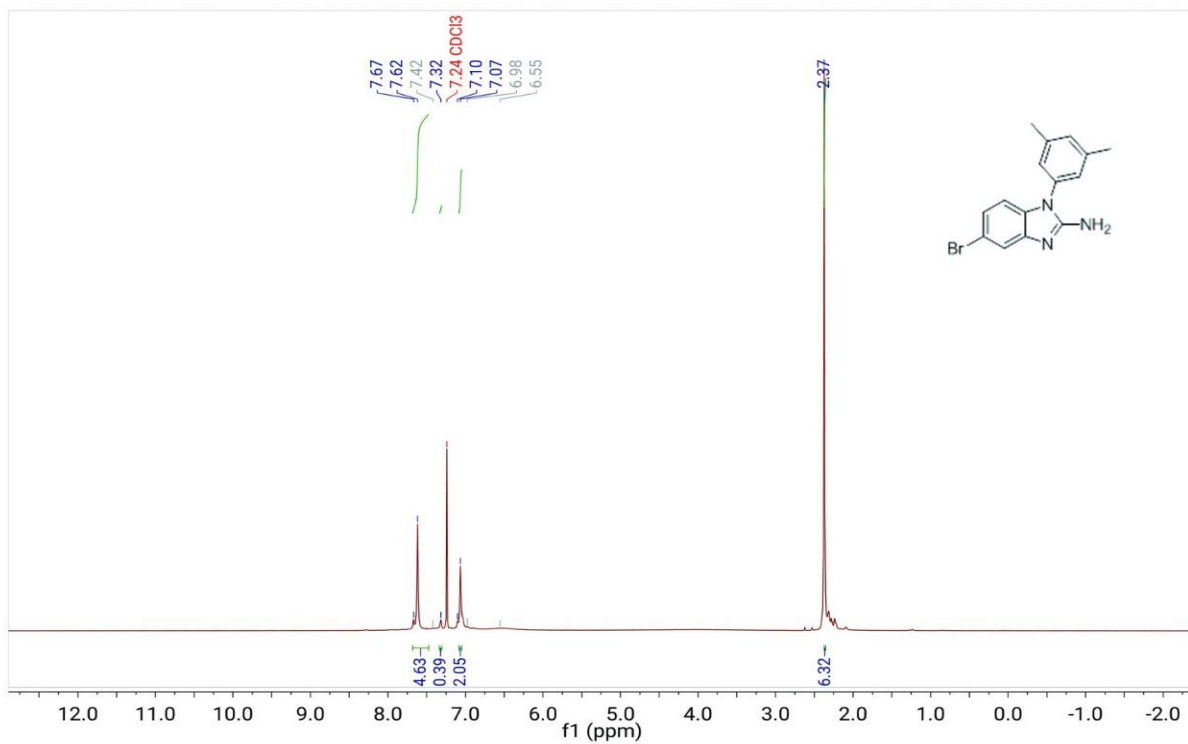

**Figure S9.** <sup>1</sup>H NMR (400 MHz, CDCl<sub>3</sub>) of compound **1e**.

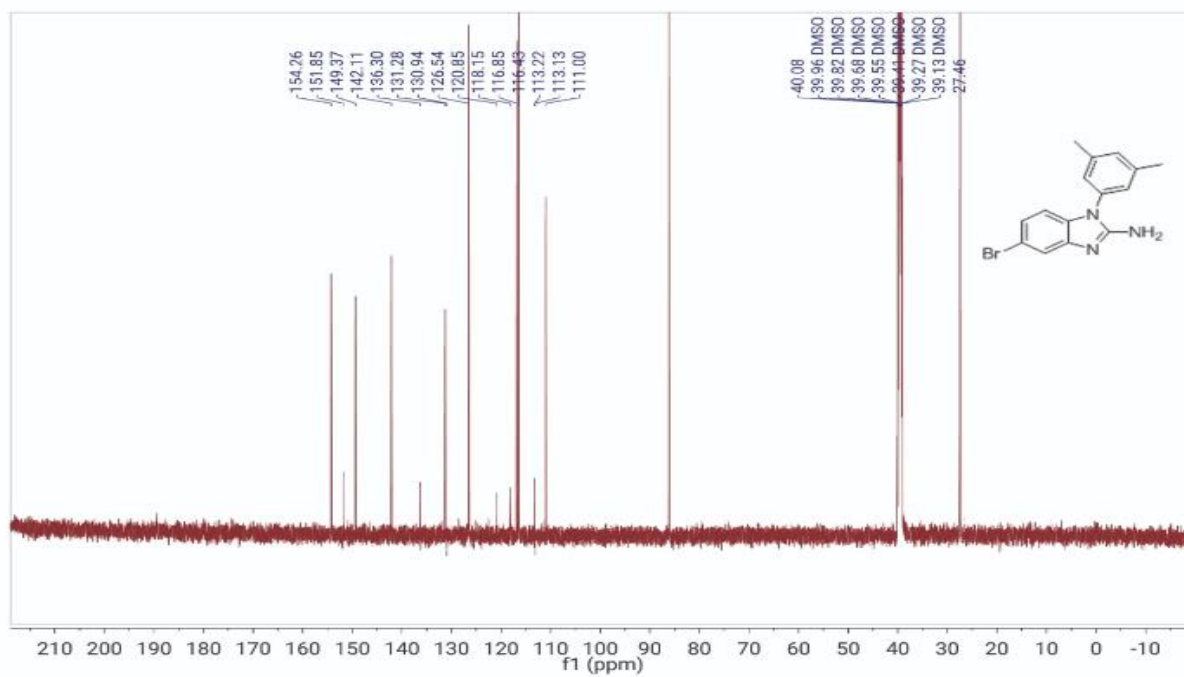

**Figure S10.** <sup>13</sup>C NMR (125 MHz, DMSO-*d*<sub>6</sub>) of compound **1e**.

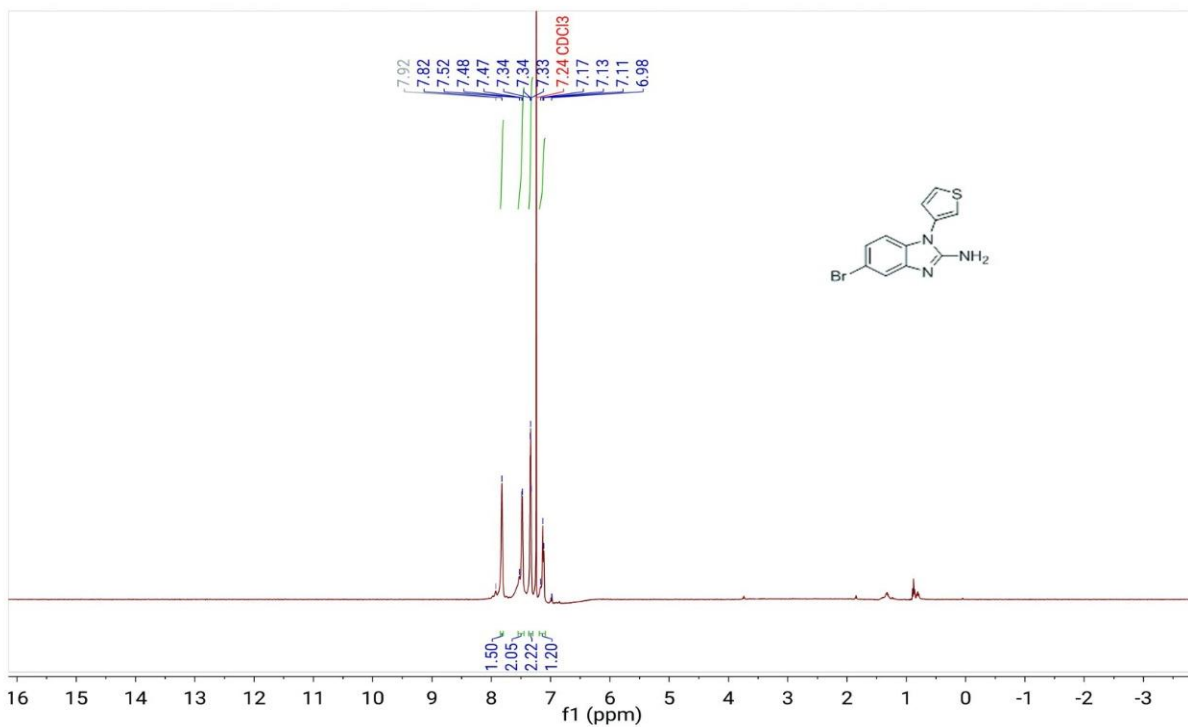

**Figure S11.** <sup>1</sup>H NMR (400 MHz, CDCl<sub>3</sub>) of compound **1f**.

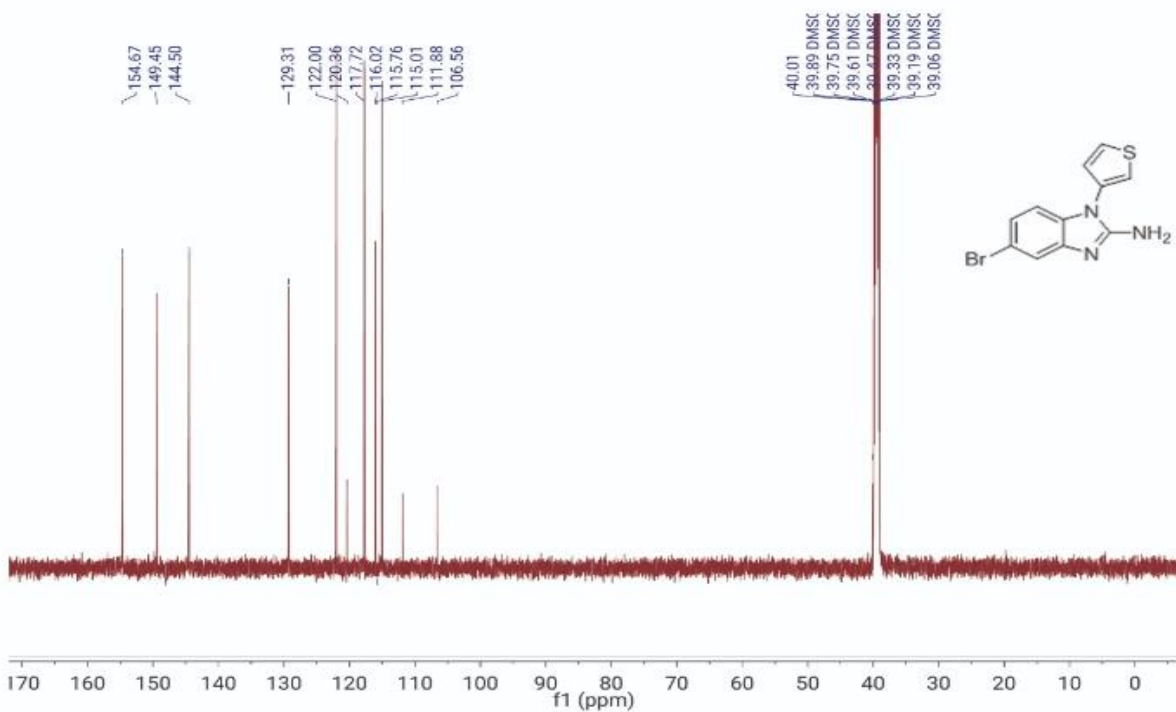

**Figure S12.** <sup>13</sup>C NMR (125 MHz, DMSO-*d*<sub>6</sub>) of compound **1f**.



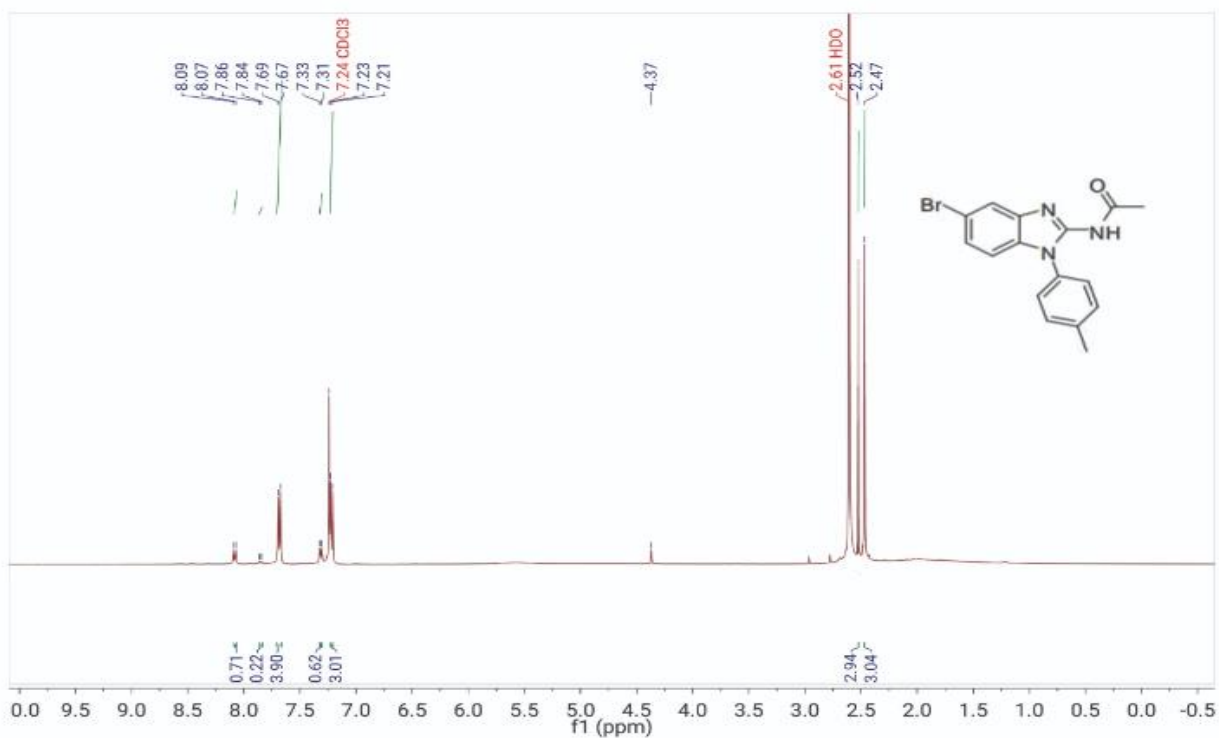

**Figure S13.** <sup>1</sup>H NMR (400 MHz, CDCl<sub>3</sub>) of compound **2a**.

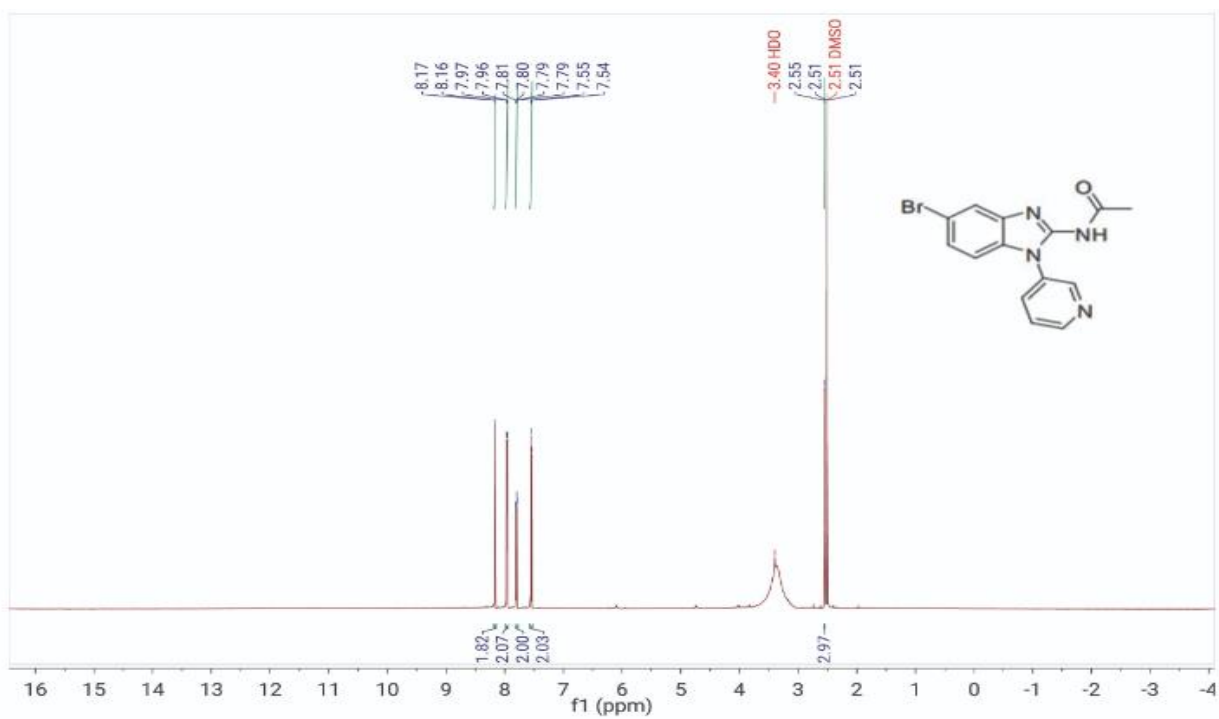

**Figure S14.** <sup>1</sup>H NMR (400 MHz, DMSO-*d*<sub>6</sub>) of compound **2d**.

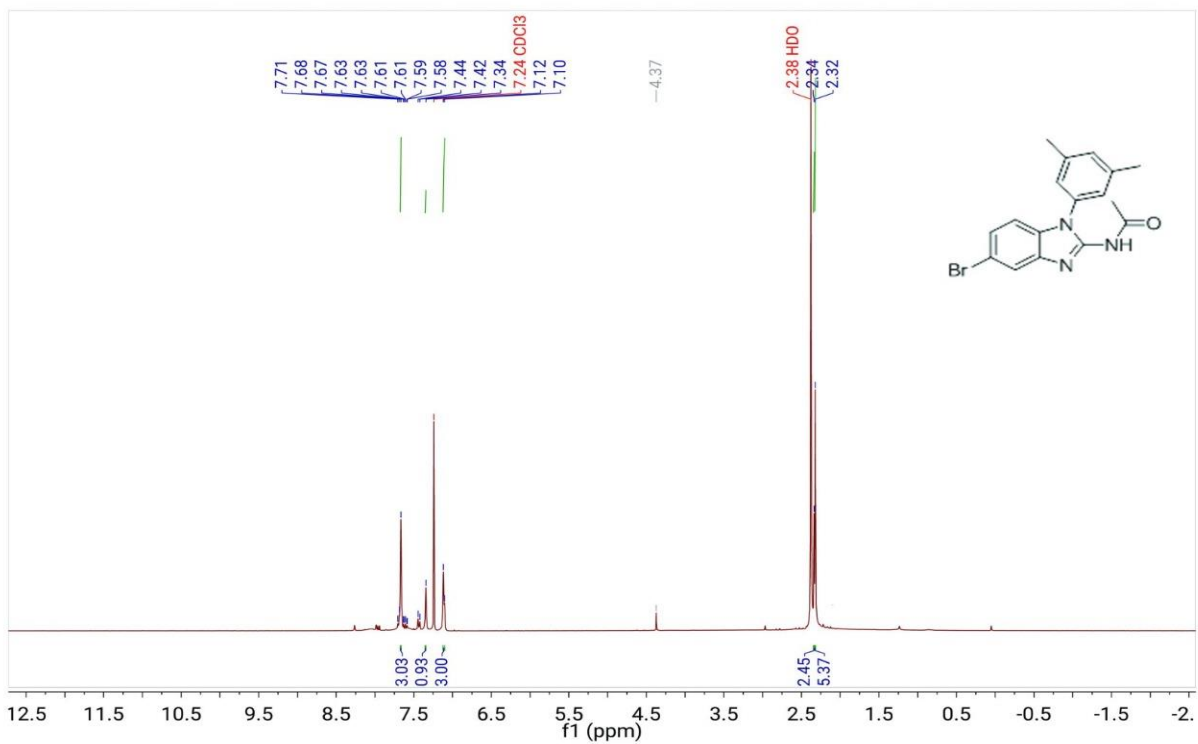

**Figure S15.** <sup>1</sup>H NMR (400 MHz, CDCl<sub>3</sub>) of compound **2e**.

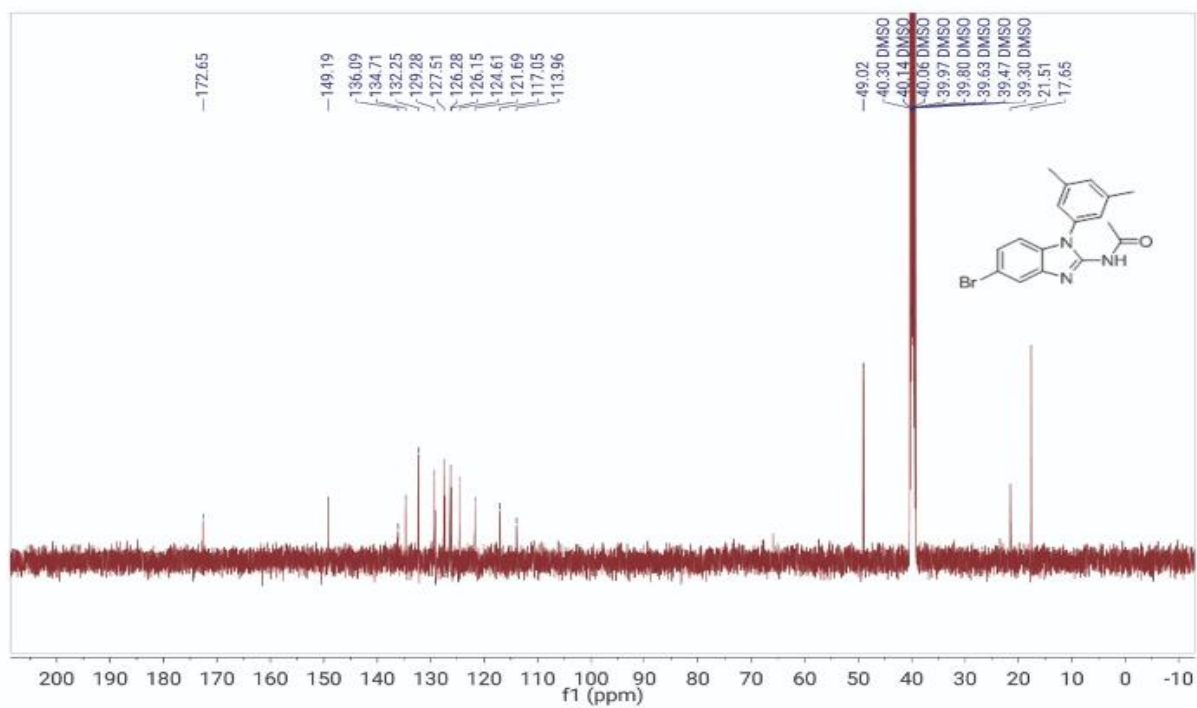

**Figure S16.** <sup>13</sup>C NMR (125 MHz, DMSO-*d*<sub>6</sub>) of compound **2e**.

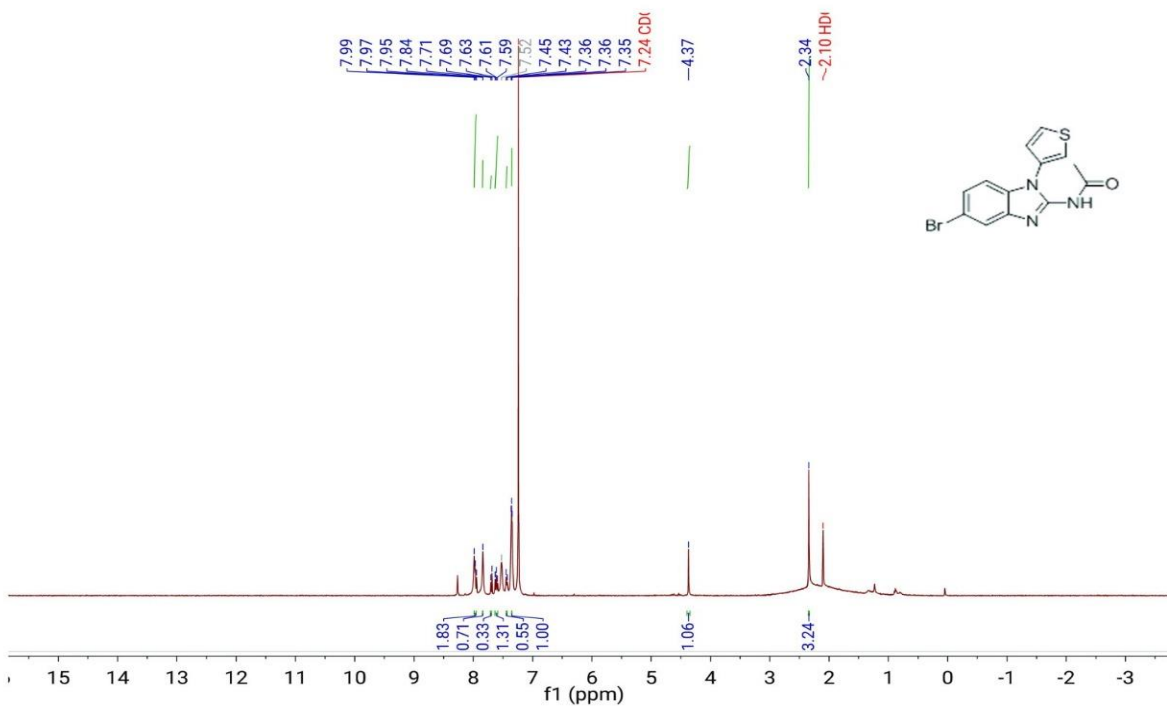

**Figure S17.** <sup>1</sup>H NMR (400 MHz, CDCl<sub>3</sub>) of compound **2f**.

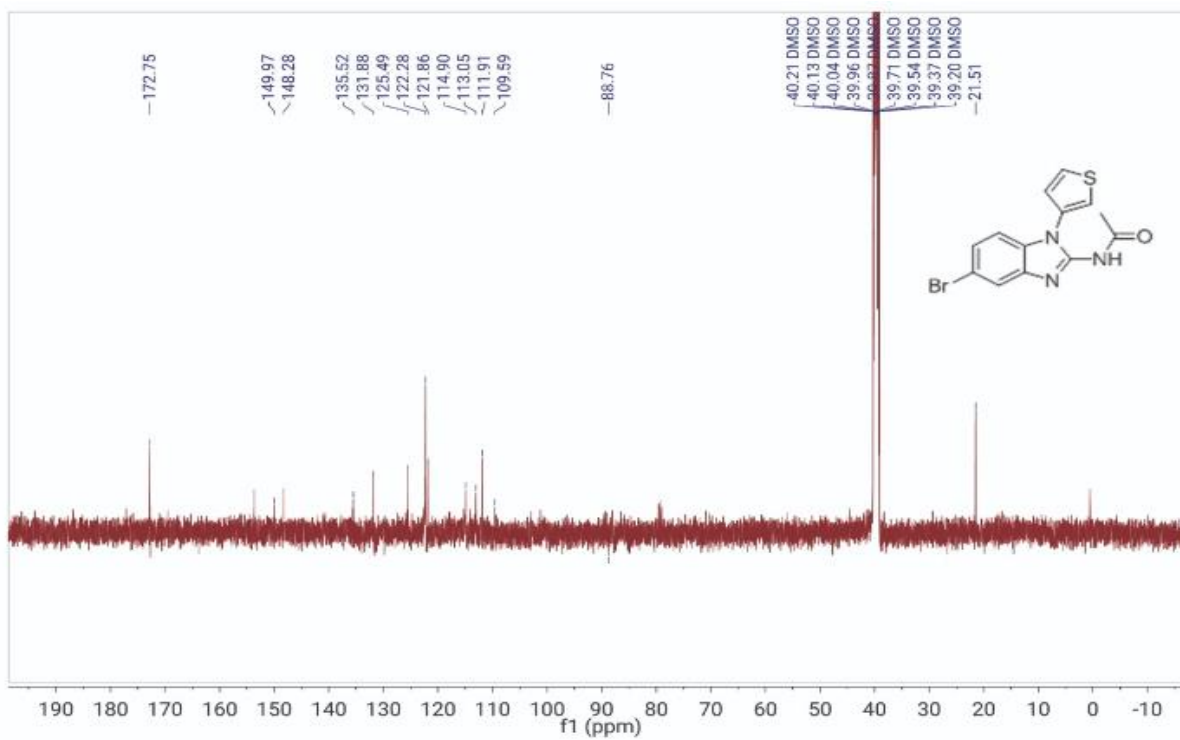

**Figure S18.** <sup>13</sup>C NMR (125 MHz, DMSO-*d*<sub>6</sub>) of compound **24**.

**Table S1.** Polarizability ( $\alpha_o$ , in au) and hyperpolarizability ( $\beta_o$ , in au) of compounds **1a-1f** and **2a-2f** at LC-BLYP, and  $\omega$ B97XD.

| Compounds | LC-BLYP    |                        | $\omega$ B97XD |                        |
|-----------|------------|------------------------|----------------|------------------------|
|           | $\alpha_o$ | $\beta_o$              | $\alpha_o$     | $\beta_o$              |
| <b>1a</b> | 220        | $3.69 \times 10^{-30}$ | 227            | $4.40 \times 10^{-30}$ |
| <b>1b</b> | 208        | $5.63 \times 10^{-30}$ | 215            | $5.31 \times 10^{-30}$ |
| <b>1c</b> | 203        | $3.83 \times 10^{-30}$ | 210            | $3.53 \times 10^{-30}$ |
| <b>1d</b> | 183        | $3.89 \times 10^{-30}$ | 189            | $4.17 \times 10^{-30}$ |
| <b>1e</b> | 214        | $3.82 \times 10^{-30}$ | 221            | $3.70 \times 10^{-30}$ |
| <b>1f</b> | 182        | $3.98 \times 10^{-30}$ | 188            | $3.99 \times 10^{-30}$ |
| <b>2a</b> | 228        | $1.81 \times 10^{-30}$ | 235            | $1.93 \times 10^{-30}$ |
| <b>2b</b> | 232        | $3.82 \times 10^{-30}$ | 239            | $3.44 \times 10^{-30}$ |
| <b>2c</b> | 228        | $1.89 \times 10^{-30}$ | 236            | $1.90 \times 10^{-30}$ |
| <b>2d</b> | 208        | $1.80 \times 10^{-30}$ | 215            | $2.27 \times 10^{-30}$ |
| <b>2e</b> | 239        | $1.73 \times 10^{-30}$ | 246            | $1.95 \times 10^{-30}$ |
| <b>2f</b> | 208        | $1.98 \times 10^{-30}$ | 214            | $2.44 \times 10^{-30}$ |
